# Supplementary material for: Laser-induced breakdown spectroscopy to obtain quantitative three-dimensional hydrogen mapping in a nickel–metal-hydride battery cathode for interpreting its reaction distribution
Source: Royal Society of Chemistry journal article supplement (doi:10.1039/d2an01147f), 2022-01-01
Supplement: d2an01147f1.pdf [file d2an01147f1.pdf]

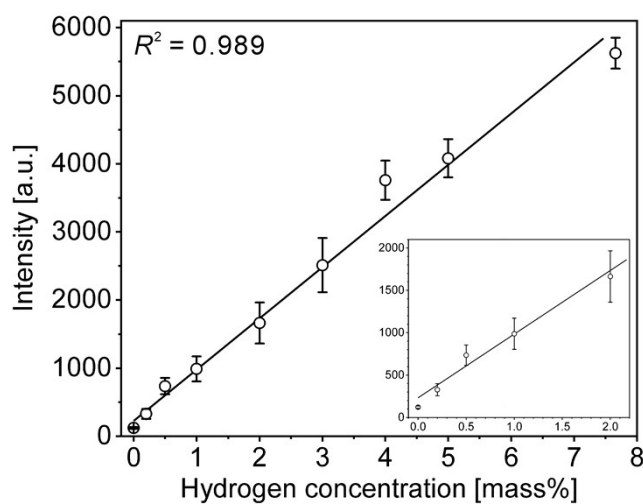

**Fig. S1** Calibration curve based on the intensity of the hydrogen emission line (H 656.28 nm line) measured under reduced helium (3000 Pa). (An enlarged calibration curve is shown in the bottom right) Pellets of powder mixtures of Mg and MgH<sub>2</sub> were used as samples<sup>37</sup>.
